# Supplementary material for: Guanidinatoaluminum complexes: synthesis, crystal structures and reactivities
Source: Royal Society of Chemistry journal article supplement (doi:10.1039/c6ra18367k), 2016-01-01
Supplement: c6ra18367k1.pdf [file c6ra18367k1.pdf]

### The $^1\text{H}$ and $^{13}\text{C}$ NMR spectra of **1-8**

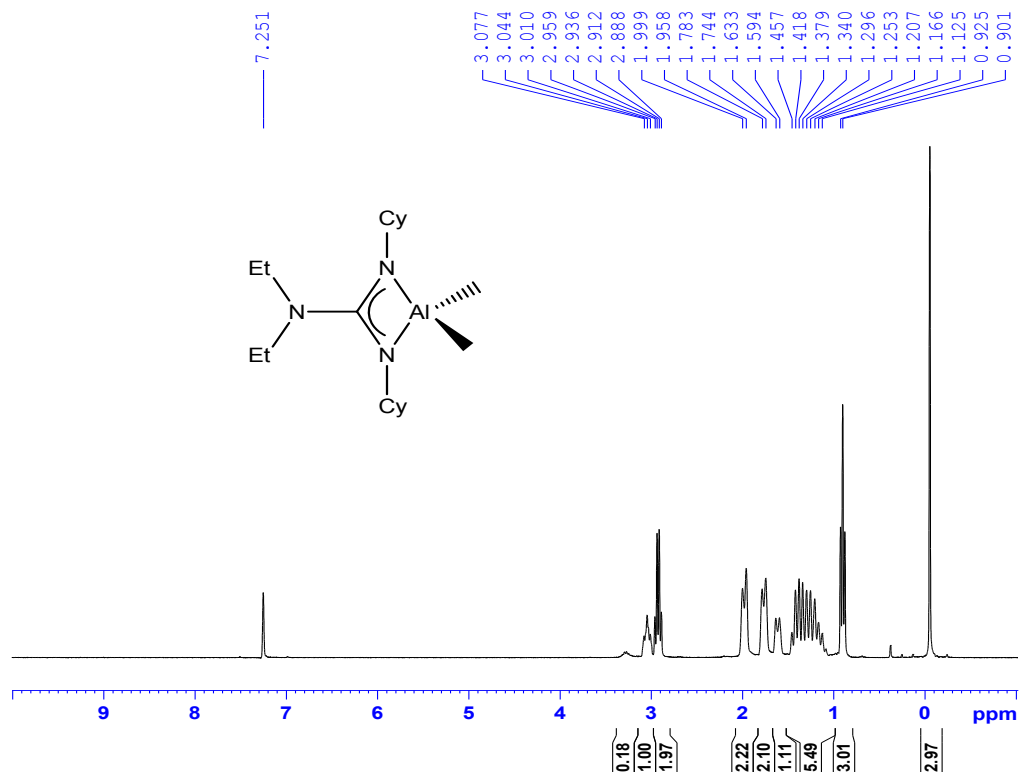

### The $^1\text{H}$ NMR spectra of **1**

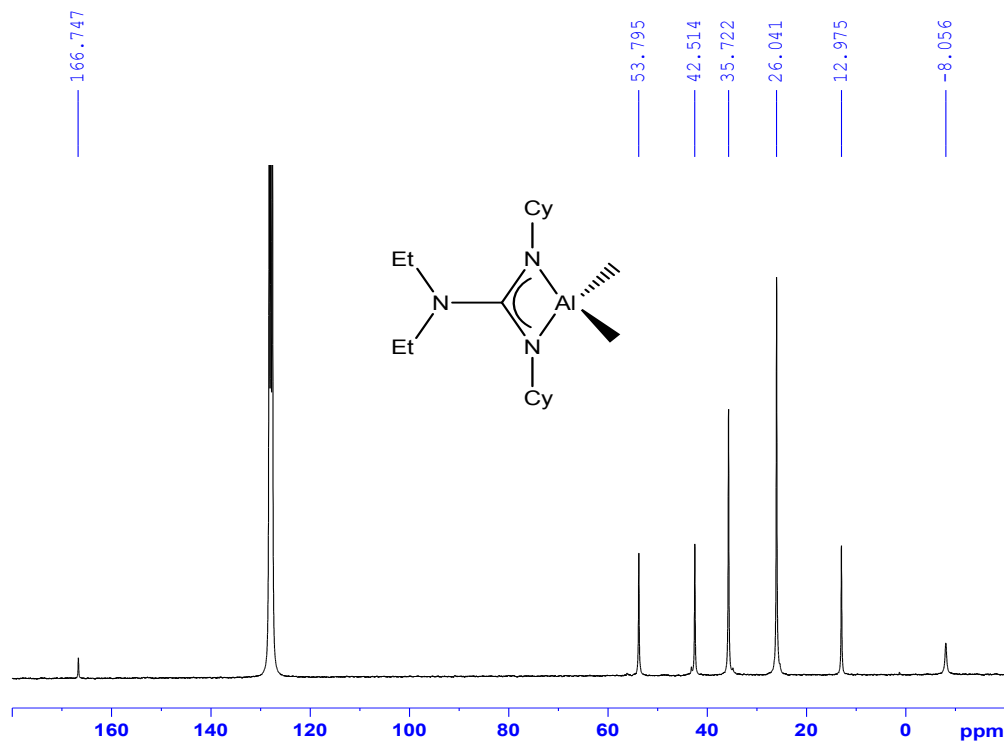

### The $^{13}\text{C}$ NMR spectra of **1**

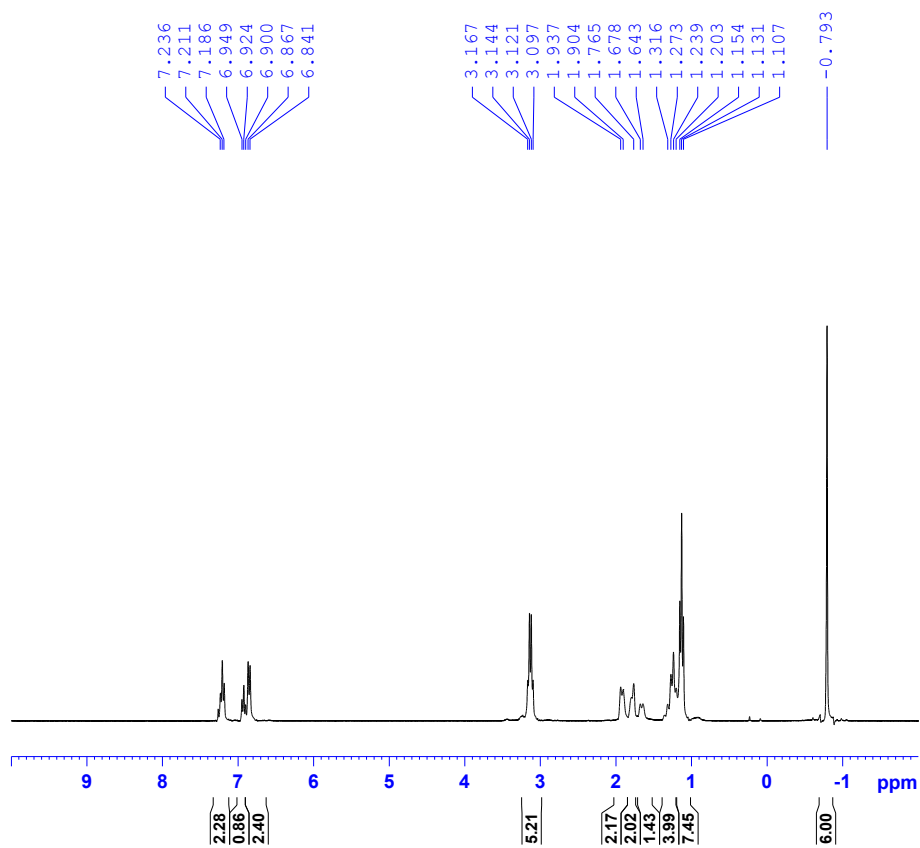

The  $^1\text{H}$  NMR spectra of **2**

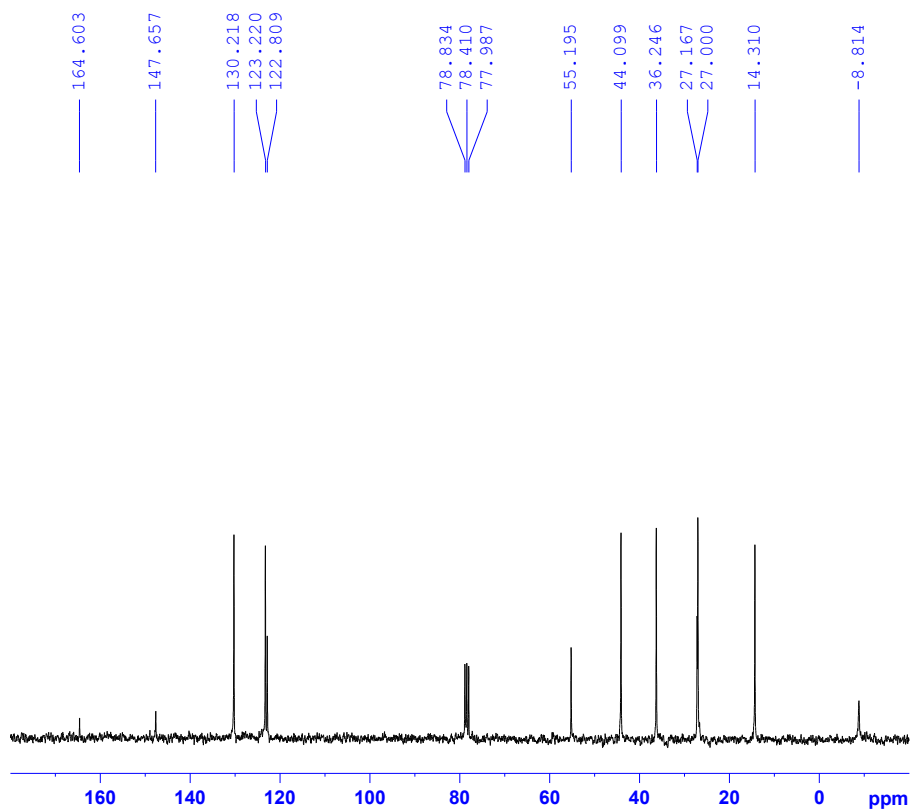

The  $^{13}\text{C}$  NMR spectra of **2**

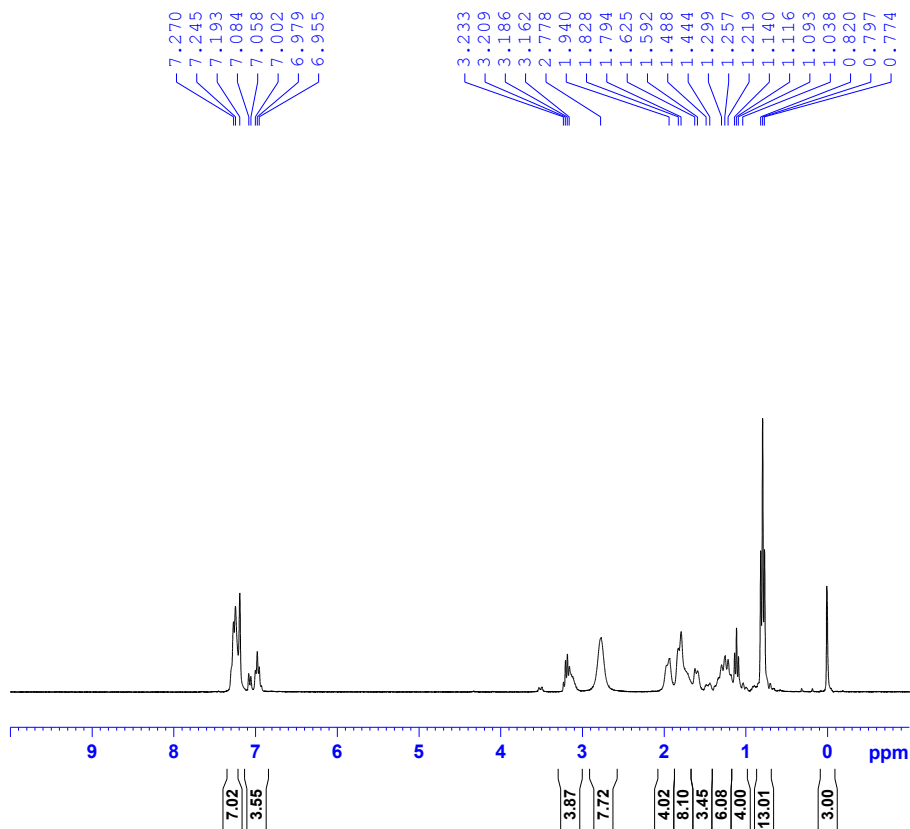

The  $^1\text{H}$  NMR spectra of **3**

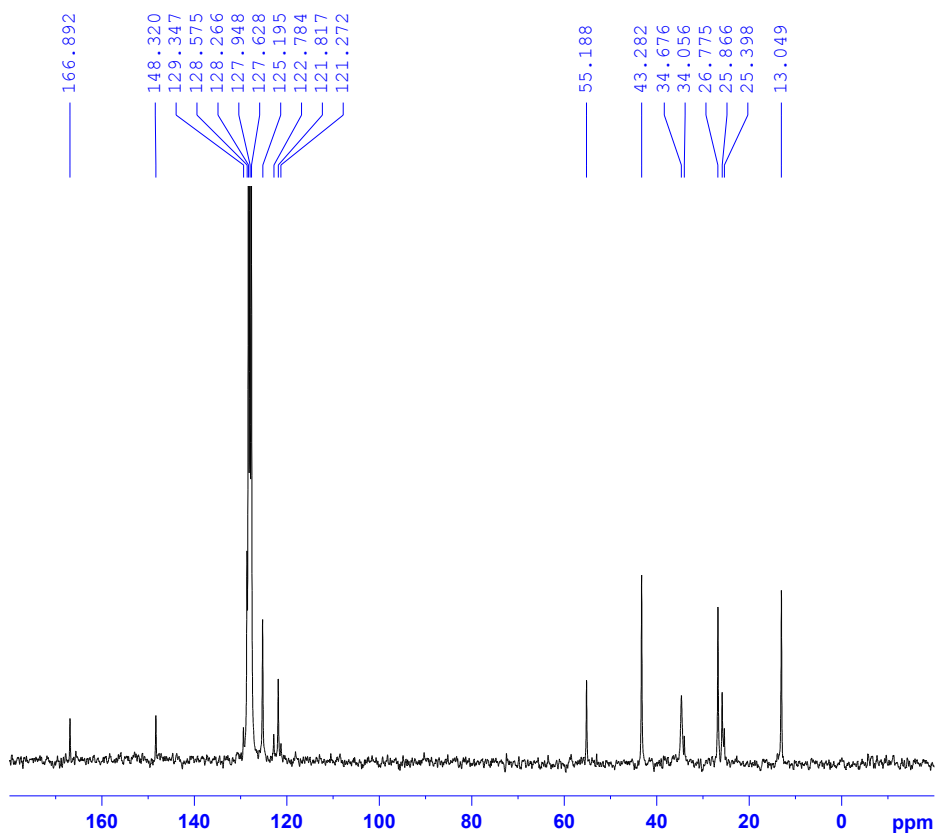

The  $^{13}\text{C}$  NMR spectra of **3**

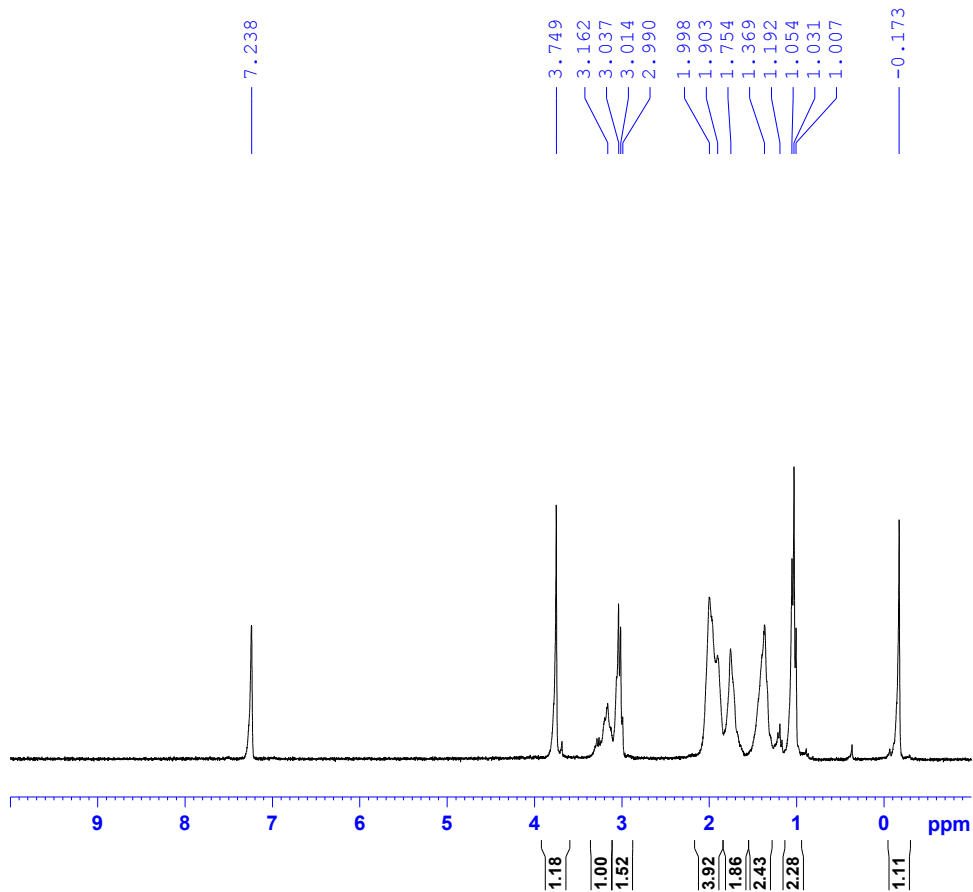

The  $^1\text{H}$  NMR spectra of **4**

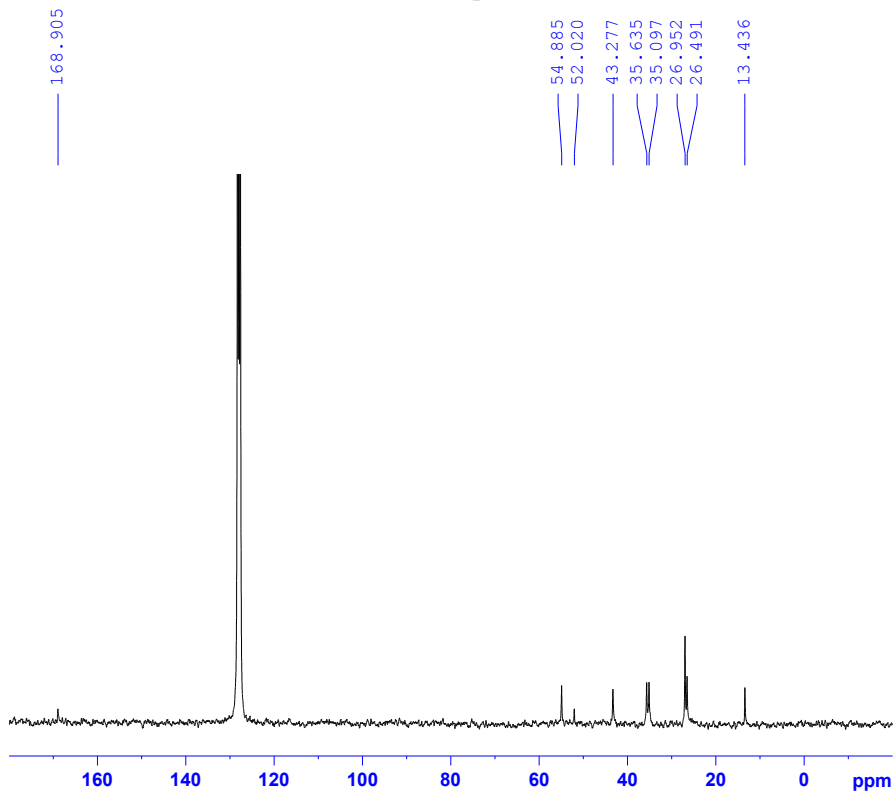

The  $^{13}\text{C}$  NMR spectra of **4**

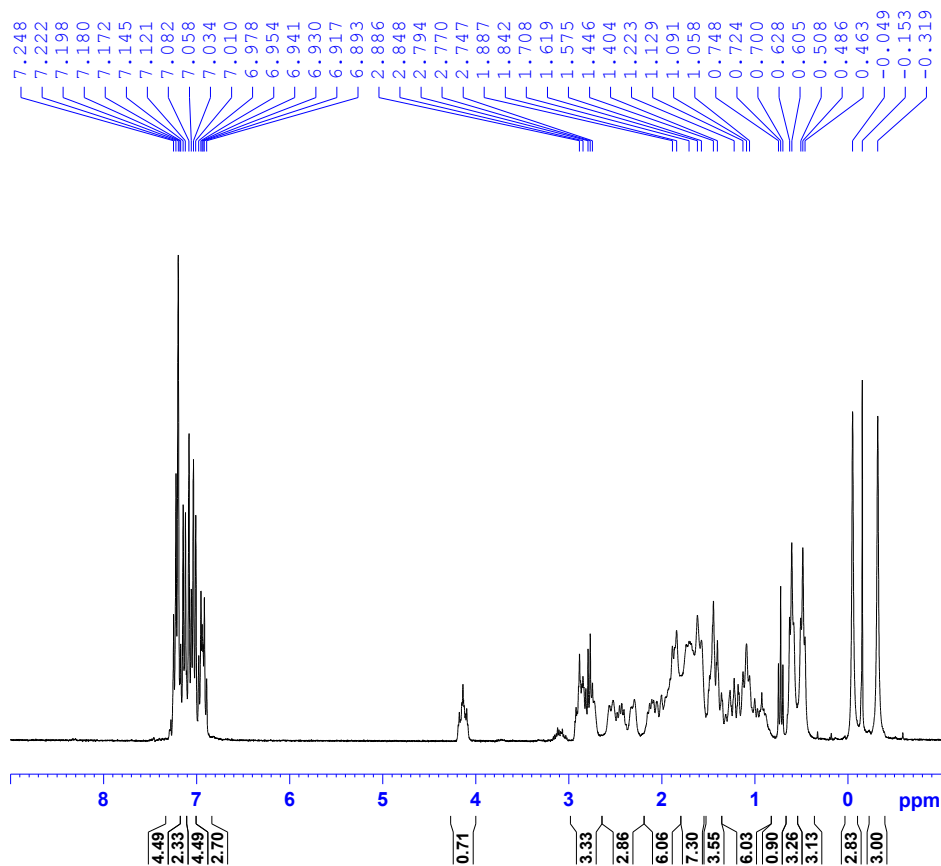

The  $^1\text{H}$  NMR spectra of **5**

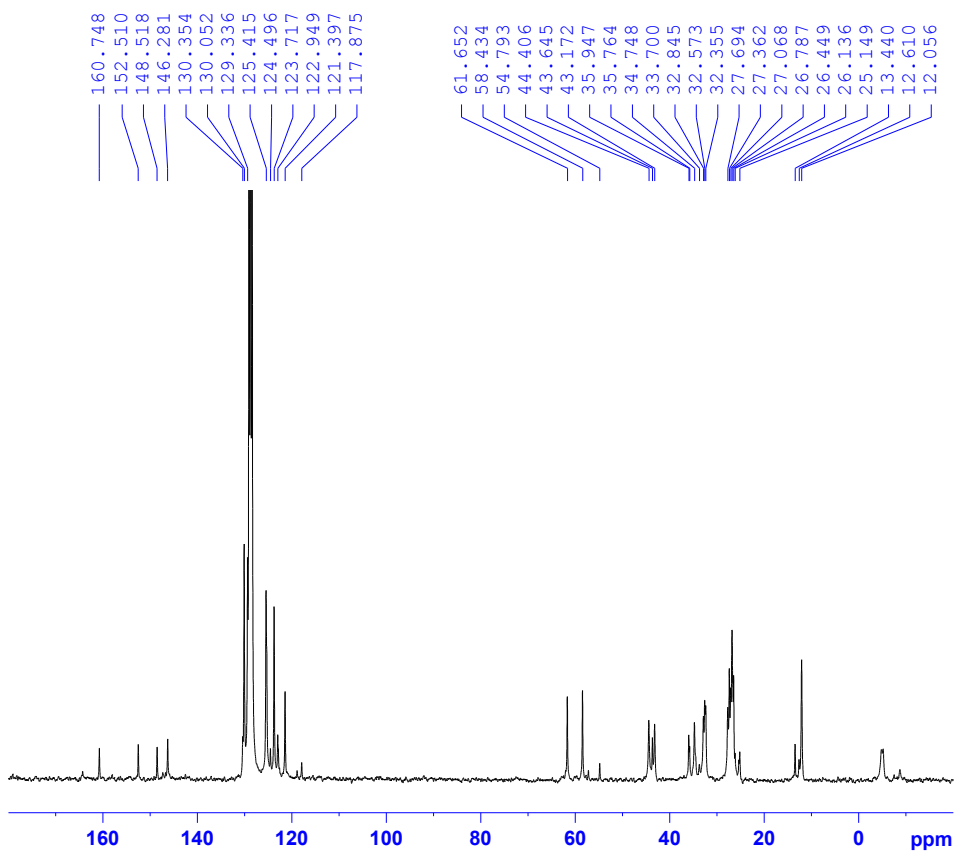

The  $^{13}\text{C}$  NMR spectra of **5**

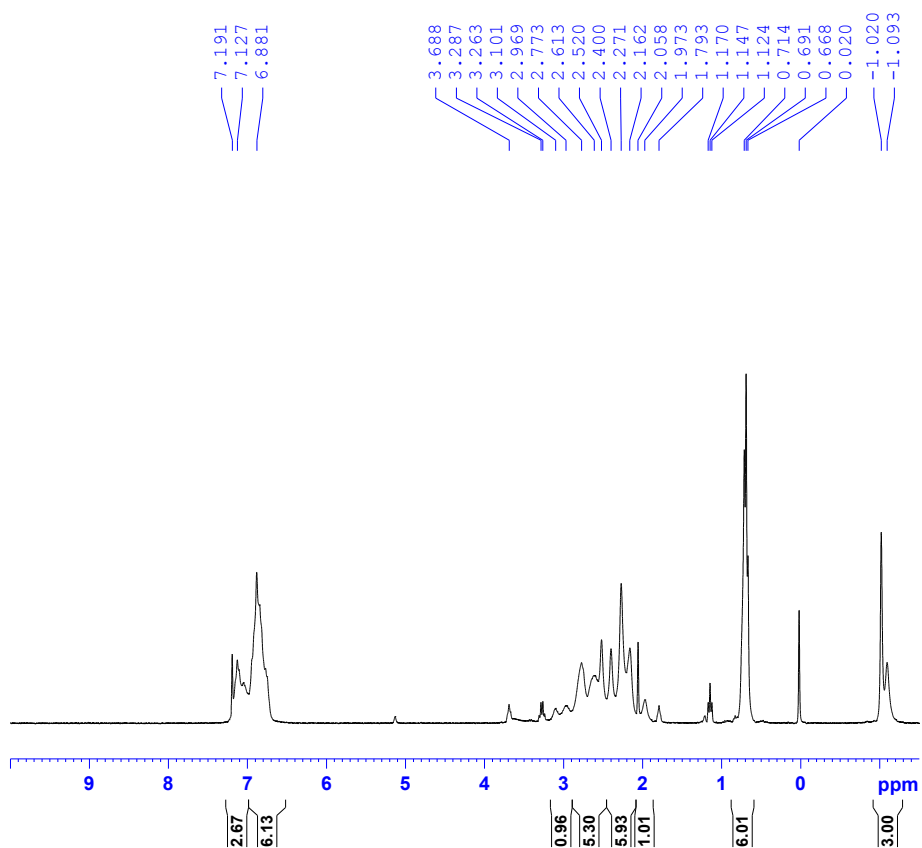

The  $^1\text{H}$  NMR spectra of **6**

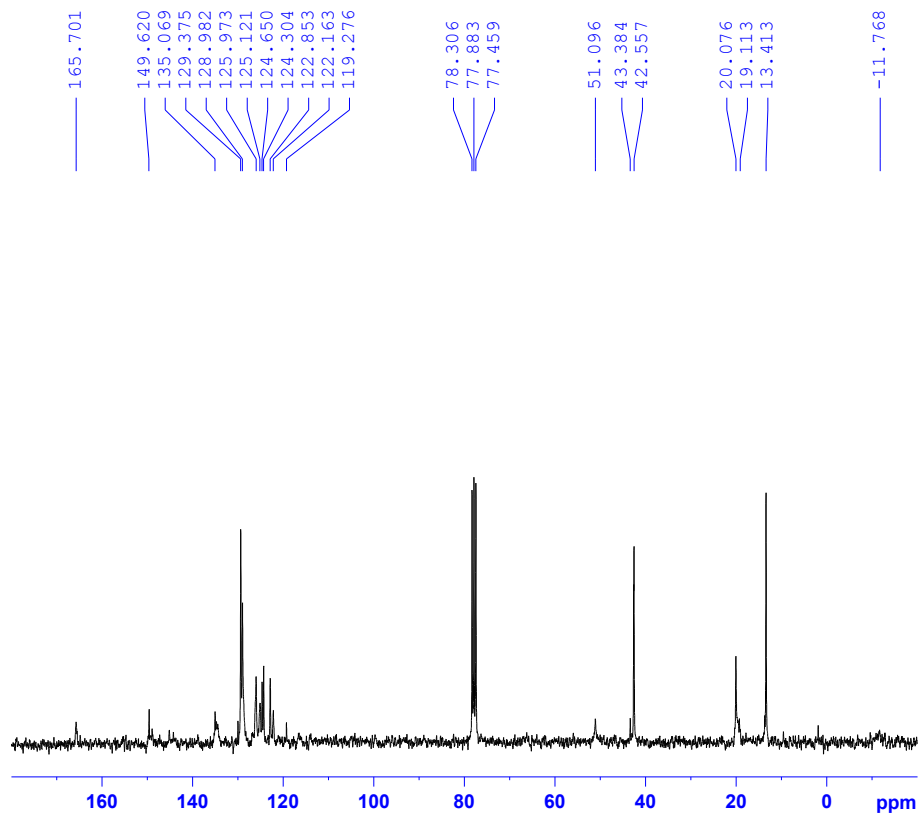

The  $^{13}\text{C}$  NMR spectra of **6**

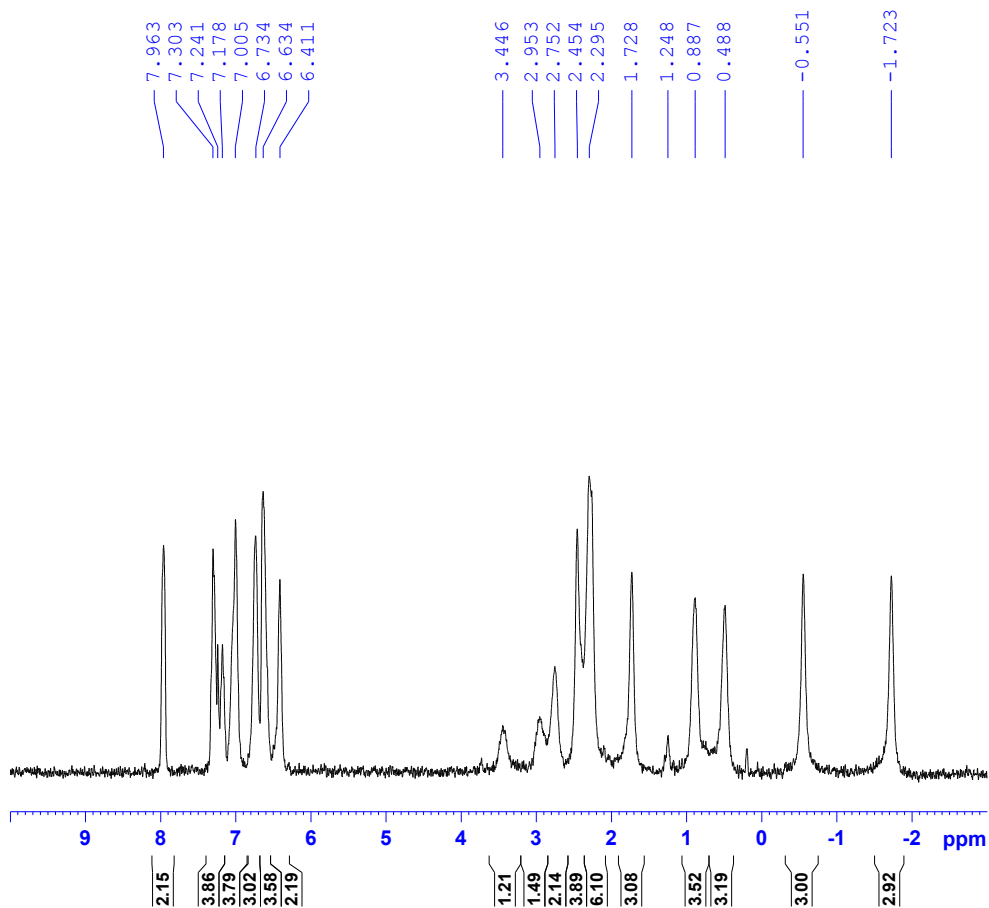

The  $^1\text{H}$  NMR spectra of **7**

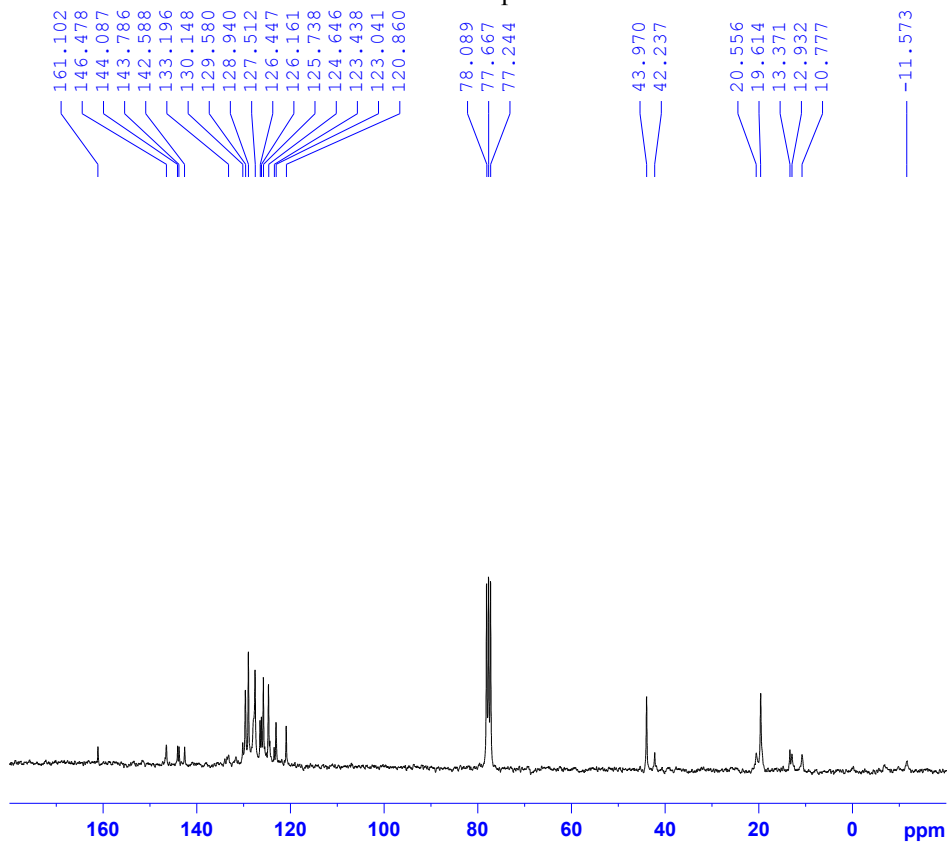

The  $^{13}\text{C}$  NMR spectra of **7**

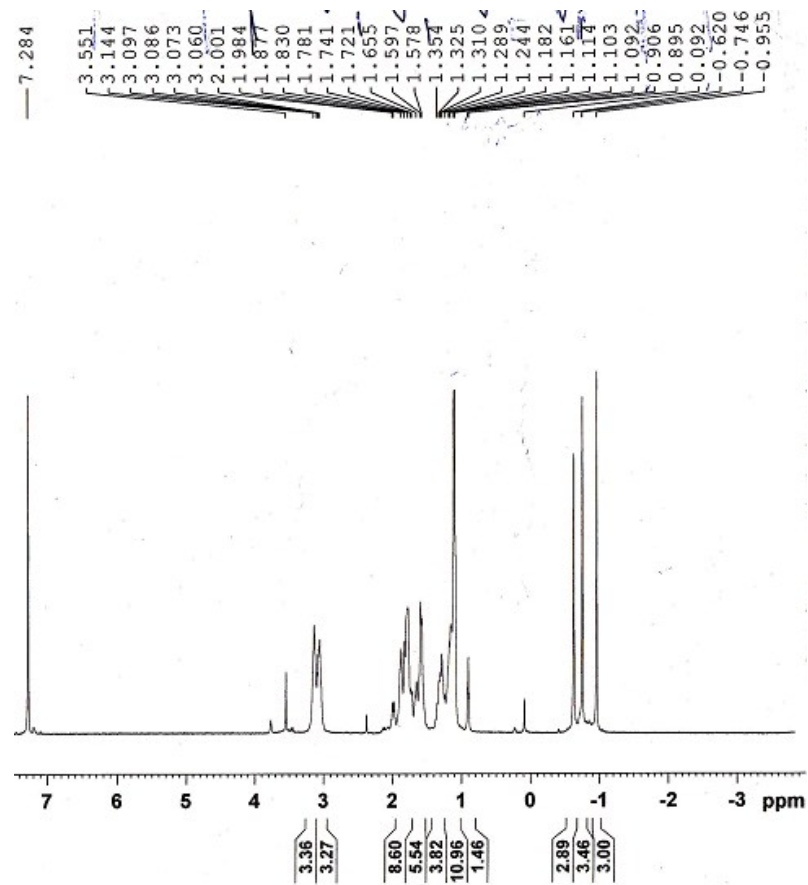

The  $^1\text{H}$  NMR spectra of **8**

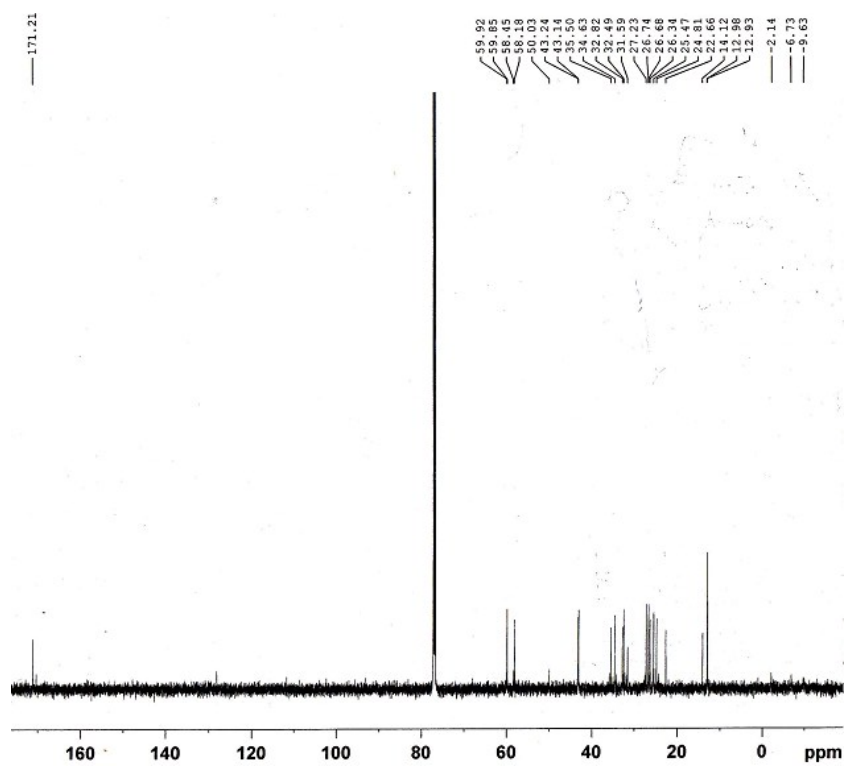

The  $^{13}\text{C}$  NMR spectra of **8**
